# Supplementary material for: Importance sampling within configuration space integration for adsorbate thermophysical properties: a case study for CH3/Ni(111)
Source: Royal Society of Chemistry journal article supplement (doi:10.1039/d4cp01197j), 2024-01-01
Supplement: d4cp01197j1.pdf [file d4cp01197j1.pdf]

**Supporting Information:**  
**Importance Sampling within Configuration**  
**Space Integration for Adsorbate**  
**Thermophysical Properties: a case study for**  
**CH<sub>3</sub>/Ni(111)**

Katrín Blöndal,<sup>†</sup> Kirk Badger,<sup>†</sup> Khachik Sargsyan,<sup>‡</sup> David H. Bross,<sup>¶</sup> Branko  
Ruscic,<sup>¶</sup> and C. Franklin Goldsmith\*,<sup>†</sup>

<sup>†</sup>*Chemical Engineering Group, School of Engineering, Brown University,  
Providence, RI 02912, USA*

<sup>‡</sup>*Sandia National Laboratories,  
Livermore, CA 94550, USA*

<sup>¶</sup>*Chemical Sciences and Engineering Division, Argonne National Laboratory,  
Lemont, IL 60439, USA*

E-mail: franklin\_goldsmith@brown.edu

## Rigid body Hessians

Rigid body Hessians were calculated for the two binding positions of methyl and were used to describe the covariance when generating the gaussian training geometries. These matrices

are:

$$H_{fcc} = \begin{bmatrix} 3.43e+00 & 5.44e-03 & -3.71e-02 & -2.24e-01 & -3.85e-01 & 1.00e-02 \\ 5.44e-03 & 3.43e+00 & -4.76e-03 & 3.74e-01 & -2.17e-01 & 2.07e-02 \\ -3.71e-02 & -4.76e-03 & 8.55e+00 & -1.33e-02 & -1.48e-03 & -1.22e-02 \\ -2.24e-01 & 3.74e-01 & -1.33e-02 & 2.12e+00 & 1.21e-03 & 8.46e-03 \\ -3.85e-01 & -2.17e-01 & -1.48e-03 & 1.21e-03 & 2.10e+00 & -1.01e-02 \\ 1.00e-02 & 2.07e-02 & -1.22e-02 & 8.46e-03 & -1.01e-02 & 2.02e+00 \end{bmatrix}$$

$$H_{hcp} = \begin{bmatrix} 2.83e+00 & 2.04e-03 & 1.12e-02 & -3.56e-01 & -6.66e-03 & -7.40e-04 \\ 2.04e-03 & 2.85e+00 & 3.30e-02 & 8.52e-03 & -3.49e-01 & -1.85e-03 \\ 1.12e-02 & 3.30e-02 & 6.92e+00 & -2.07e-02 & -1.96e-02 & 3.33e-03 \\ -3.56e-01 & 8.52e-03 & -2.07e-02 & 2.05e+00 & 1.21e-03 & 4.03e-04 \\ -6.66e-03 & -3.49e-01 & -1.96e-02 & 1.21e-03 & 2.02e+00 & 1.62e-03 \\ -7.40e-04 & -1.85e-03 & 3.33e-03 & 4.03e-04 & 1.61e-03 & 1.93e+00 \end{bmatrix}$$

## Vibrational frequencies

Table S1: After diagonalization of the full 3N Hessians for both binding sites the following vibrational frequencies were found and used in calculating the partition functions for the internal modes.

| Mode number | Frequency $\text{cm}^{-1}$ |        |
|-------------|----------------------------|--------|
|             | fcc                        | hcp    |
| 1           | 1168.5                     | 1140.0 |
| 2           | 1282.5                     | 1288.7 |
| 3           | 1287.9                     | 1289.9 |
| 4           | 2752.9                     | 2769.7 |
| 5           | 2821.1                     | 2836.6 |
| 6           | 2821.8                     | 2837.2 |

## Coordinates of the minima

Table S2: Positions of atoms for the fcc binding site

| Atom type | Positions |       |       |
|-----------|-----------|-------|-------|
|           | x         | y     | z     |
| Ni        | 0.00      | 0.00  | -6.04 |
| Ni        | 2.47      | 0.00  | -6.04 |
| Ni        | 4.94      | 0.00  | -6.04 |
| Ni        | 1.23      | 2.14  | -6.04 |
| Ni        | 3.70      | 2.14  | -6.04 |
| Ni        | 6.17      | 2.14  | -6.04 |
| Ni        | 2.47      | 4.27  | -6.04 |
| Ni        | 4.94      | 4.27  | -6.04 |
| Ni        | 7.40      | 4.27  | -6.04 |
| Ni        | 1.23      | 0.71  | -4.03 |
| Ni        | 3.70      | 0.712 | -4.03 |

|    |      |       |       |
|----|------|-------|-------|
| Ni | 6.17 | 0.712 | -4.03 |
| Ni | 2.47 | 2.85  | -4.03 |
| Ni | 4.94 | 2.85  | -4.03 |
| Ni | 7.40 | 2.85  | -4.03 |
| Ni | 3.70 | 4.99  | -4.03 |
| Ni | 6.17 | 4.99  | -4.03 |
| Ni | 8.64 | 4.99  | -4.03 |
| Ni | 0.00 | 1.42  | -2.01 |
| Ni | 2.47 | 1.42  | -2.01 |
| Ni | 4.94 | 1.42  | -2.01 |
| Ni | 1.23 | 3.56  | -2.01 |
| Ni | 3.70 | 3.56  | -2.01 |
| Ni | 6.17 | 3.56  | -2.01 |
| Ni | 2.47 | 5.70  | -2.01 |
| Ni | 4.94 | 5.70  | -2.01 |
| Ni | 7.40 | 5.70  | -2.01 |
| Ni | 0.00 | 0.00  | 0.00  |
| Ni | 2.47 | 0.00  | 0.00  |
| Ni | 4.94 | 0.00  | 0.00  |
| Ni | 1.23 | 2.14  | 0.00  |
| Ni | 3.70 | 2.14  | 0.00  |
| Ni | 6.17 | 2.14  | 0.00  |
| Ni | 2.47 | 4.27  | 0.00  |
| Ni | 4.94 | 4.27  | 0.00  |
| Ni | 7.40 | 4.27  | 0.00  |
| C  | 1.23 | 0.71  | 1.54  |
| H  | 1.23 | 1.75  | 1.96  |

|   |      |      |      |
|---|------|------|------|
| H | 2.13 | 0.20 | 1.96 |
| H | 0.34 | 0.20 | 1.96 |

Table S3: Positions of atoms for the hcp binding site

|           | Positions |       |       |
|-----------|-----------|-------|-------|
| Atom type | x         | y     | z     |
| Ni        | 0.00      | 0.00  | -6.04 |
| Ni        | 2.47      | 0.00  | -6.04 |
| Ni        | 4.94      | 0.00  | -6.04 |
| Ni        | 1.23      | 2.14  | -6.04 |
| Ni        | 3.70      | 2.14  | -6.04 |
| Ni        | 6.17      | 2.14  | -6.04 |
| Ni        | 2.47      | 4.27  | -6.04 |
| Ni        | 4.94      | 4.27  | -6.04 |
| Ni        | 7.40      | 4.27  | -6.04 |
| Ni        | 1.23      | 0.71  | -4.03 |
| Ni        | 3.70      | 0.712 | -4.03 |
| Ni        | 6.17      | 0.712 | -4.03 |
| Ni        | 2.47      | 2.85  | -4.03 |
| Ni        | 4.94      | 2.85  | -4.03 |
| Ni        | 7.40      | 2.85  | -4.03 |
| Ni        | 3.70      | 4.99  | -4.03 |
| Ni        | 6.17      | 4.99  | -4.03 |
| Ni        | 8.64      | 4.99  | -4.03 |
| Ni        | 0.00      | 1.42  | -2.01 |
| Ni        | 2.47      | 1.42  | -2.01 |

|    |      |       |       |
|----|------|-------|-------|
| Ni | 4.94 | 1.42  | -2.01 |
| Ni | 1.23 | 3.56  | -2.01 |
| Ni | 3.70 | 3.56  | -2.01 |
| Ni | 6.17 | 3.56  | -2.01 |
| Ni | 2.47 | 5.70  | -2.01 |
| Ni | 4.94 | 5.70  | -2.01 |
| Ni | 7.40 | 5.70  | -2.01 |
| Ni | 0.00 | 0.00  | 0.00  |
| Ni | 2.47 | 0.00  | 0.00  |
| Ni | 4.94 | 0.00  | 0.00  |
| Ni | 1.23 | 2.14  | 0.00  |
| Ni | 3.70 | 2.14  | 0.00  |
| Ni | 6.17 | 2.14  | 0.00  |
| Ni | 2.47 | 4.27  | 0.00  |
| Ni | 4.94 | 4.27  | 0.00  |
| Ni | 7.40 | 4.27  | 0.00  |
| C  | 2.47 | 1.42  | 1.56  |
| H  | 1.57 | 1.94  | 1.98  |
| H  | 3.36 | 1.94  | 1.98  |
| H  | 2.47 | 0.392 | 1.99  |

## Convergence data

Maybe we can also add the "f-study" figure here.

Table S4: Comparison of the integral value:  $I_0$  for both GMMT and MC at the three sampled temperatures.

---

| $I_0$    |             |             |             |             |             |             |
|----------|-------------|-------------|-------------|-------------|-------------|-------------|
|          | T=300K      |             | T=600K      |             | T=900K      |             |
| M        | MC          | GMMT        | MC          | GMMT        | MC          | GMMT        |
| 100      | 1.39461E-11 | 9.55742E-08 | 3.02496E-09 | 1.65088E-06 | 3.31088E-08 | 2.69035E-05 |
| 200      | 2.06516E-09 | 3.65672E-07 | 3.96318E-08 | 6.27694E-06 | 4.91988E-07 | 4.39558E-05 |
| 400      | 1.23783E-08 | 1.01378E-06 | 2.3962E-07  | 1.26578E-05 | 7.55917E-06 | 0.000118043 |
| 800      | 6.15616E-08 | 2.18095E-06 | 7.7453E-07  | 1.80321E-05 | 1.20119E-05 | 0.000228472 |
| 1600     | 1.48266E-07 | 6.38479E-06 | 2.40914E-06 | 3.18131E-05 | 2.8871E-05  | 0.000341311 |
| 3200     | 4.81879E-07 | 1.04253E-05 | 4.29241E-06 | 5.81652E-05 | 7.15512E-05 | 0.000327998 |
| 6400     | 1.12956E-06 | 1.53288E-05 | 1.29493E-05 | 6.91736E-05 | 0.000104845 | 0.000343917 |
| 12800    | 3.00258E-06 | 1.78078E-05 | 2.29981E-05 | 7.56984E-05 | 0.000250827 | 0.000383367 |
| 25600    | 6.33145E-06 | 2.02208E-05 | 4.07486E-05 | 8.2263E-05  | 0.000310437 | 0.000406697 |
| 51200    | 9.43088E-06 | 1.98791E-05 | 4.83783E-05 | 8.55447E-05 | 0.0004321   | 0.000425287 |
| 102400   | 1.09903E-05 | 2.09088E-05 | 6.8707E-05  | 8.32246E-05 | 0.000465654 | 0.00042745  |
| 204800   | 1.39561E-05 | 2.15654E-05 | 7.15866E-05 | 8.5882E-05  | 0.000453419 | 0.000454288 |
| 409600   | 1.69523E-05 | 2.11008E-05 | 8.26041E-05 | 8.71467E-05 | 0.000454069 | 0.000450418 |
| 1000000  | 1.76751E-05 | 2.17112E-05 | 8.5331E-05  | 8.74332E-05 | 0.000460528 | 0.000459008 |
| 10000000 | 2.14009E-05 | 2.18084E-05 | 8.78547E-05 | 8.75992E-05 | 0.000461327 | 0.000458956 |

Table S5: Comparison of the integral value:  $I_1$  for both GMMT and MC at the three sampled temperatures.

| $I_0$ |             |             |             |             |             |             |
|-------|-------------|-------------|-------------|-------------|-------------|-------------|
|       | T=300K      |             | T=600K      |             | T=900K      |             |
| M     | MC          | GMMT        | MC          | GMMT        | MC          | GMMT        |
| 100   | 1.13592E-05 | 6.95014E-05 | 0.000101097 | 0.000711176 | 0.001529421 | 0.006003567 |
| 200   | 2.17728E-05 | 0.000132919 | 0.000278855 | 0.000868121 | 0.002486282 | 0.00653426  |

|          |             |             |             |             |             |             |
|----------|-------------|-------------|-------------|-------------|-------------|-------------|
| 400      | 6.56515E-05 | 0.00018488  | 0.000637409 | 0.001298525 | 0.00653253  | 0.008127894 |
| 800      | 0.000134787 | 0.000208093 | 0.000866886 | 0.001526093 | 0.007465361 | 0.009845447 |
| 1600     | 0.000174089 | 0.00031198  | 0.001061197 | 0.001705091 | 0.008942861 | 0.010722366 |
| 3200     | 0.000216797 | 0.000344571 | 0.001671202 | 0.001788    | 0.010113335 | 0.01038453  |
| 6400     | 0.000252959 | 0.000400465 | 0.001666576 | 0.001850151 | 0.009955504 | 0.010903678 |
| 12800    | 0.000328493 | 0.000431772 | 0.001746796 | 0.001929037 | 0.01075448  | 0.010864165 |
| 25600    | 0.000377224 | 0.000427253 | 0.001981576 | 0.001974446 | 0.010795417 | 0.011261555 |
| 51200    | 0.000394855 | 0.000431026 | 0.001940212 | 0.001990061 | 0.011114366 | 0.011190199 |
| 102400   | 0.00040682  | 0.000431939 | 0.001926065 | 0.002008729 | 0.011306007 | 0.01126997  |
| 204800   | 0.000422028 | 0.000433274 | 0.001964185 | 0.001983102 | 0.011212416 | 0.011217375 |
| 409600   | 0.000419485 | 0.000435059 | 0.001974986 | 0.001996672 | 0.011166129 | 0.011268843 |
| 1000000  | 0.000434981 | 0.000433495 | 0.001985937 | 0.001992751 | 0.01122881  | 0.011231525 |
| 10000000 | 0.000434505 | 0.000436297 | 0.001993728 | 0.001993238 | 0.011230763 | 0.011230453 |

Table S6: Comparison of the integral value:  $I_0$  for both GMMT and MC at the three sampled temperatures.

| $I_0$ |             |             |             |             |             |             |
|-------|-------------|-------------|-------------|-------------|-------------|-------------|
|       | T=300K      |             | T=600K      |             | T=900K      |             |
| M     | MC          | GMMT        | MC          | GMMT        | MC          | GMMT        |
| 100   | 0.000448294 | 0.000887913 | 0.002881924 | 0.006498295 | 0.030141317 | 0.042088995 |
| 200   | 0.000809482 | 0.001674522 | 0.005477109 | 0.007993142 | 0.040063903 | 0.059626546 |
| 400   | 0.001344182 | 0.002029953 | 0.008299585 | 0.009997109 | 0.050249982 | 0.061237744 |
| 800   | 0.001756535 | 0.002533781 | 0.009194785 | 0.010513619 | 0.056305494 | 0.05938331  |
| 1600  | 0.002140908 | 0.002361598 | 0.011225191 | 0.011397438 | 0.06009715  | 0.062138586 |
| 3200  | 0.00218255  | 0.002612585 | 0.011716093 | 0.011735305 | 0.059556469 | 0.061652826 |
| 6400  | 0.002458438 | 0.002631951 | 0.011278861 | 0.011958729 | 0.061494533 | 0.062280312 |
| 12800 | 0.002590239 | 0.002698756 | 0.01197198  | 0.011902882 | 0.063908975 | 0.062031493 |



|          |             |             |             |             |             |             |
|----------|-------------|-------------|-------------|-------------|-------------|-------------|
| 25600    | 0.002716953 | 0.002689961 | 0.011820705 | 0.011788868 | 0.062952725 | 0.062248452 |
| 51200    | 0.002665248 | 0.002722938 | 0.012003694 | 0.012069246 | 0.062199121 | 0.061893694 |
| 102400   | 0.002719589 | 0.002714493 | 0.01218336  | 0.012070302 | 0.061871327 | 0.062317827 |
| 204800   | 0.00274874  | 0.00275786  | 0.012115489 | 0.012063351 | 0.062320991 | 0.062426984 |
| 409600   | 0.002754343 | 0.002744849 | 0.01209348  | 0.012056579 | 0.062366743 | 0.062174981 |
| 1000000  | 0.002742576 | 0.002741934 | 0.012067404 | 0.012073592 | 0.062264586 | 0.062379202 |
| 10000000 | 0.002742466 | 0.002745126 | 0.012077618 | 0.01207951  | 0.062322769 | 0.062339308 |

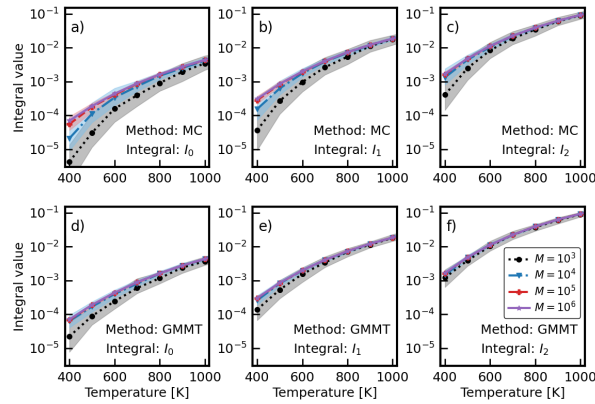

Figure S1: Demonstration of variability of MC (first row) and GMMT (second row) integration results as a function of temperature, for increasing number of integration samples,  $M$ . The quantities  $I_0$ ,  $I_1$ , and  $I_2$  are shown in the first, second and third columns, respectively. The line plots depict the medians, and the corresponding color cloud indicates 25% and 75% quantiles among 50 identical integrations.

In order to reduce the variability of a single integration, we reported the median values out of 50 replica simulations for both MC and GMMT cases. This variability is presented in Figure S1. The figure illustrates median as well as first and third quartiles of integration results out of 50 replica integrations, for all considered temperature values and for an increasing number of integration samples for each case.

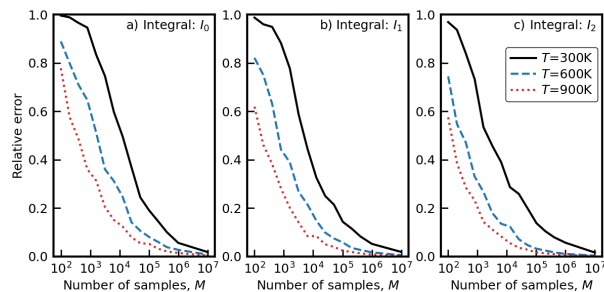

Figure S2: Convergence of GMMT estimate of each integral as the number of integration samples  $M$  increases.

## Thermodynamic properties

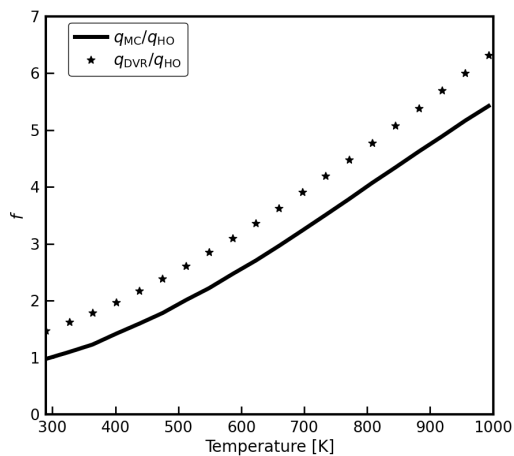

Figure S3: The anharmonic correction factor evaluated with PSI and direct state counting for  $\text{CH}_3/\text{Ni}(111)$ .

The anharmonic correction factor  $f$  is plotted in Fig. S3 for the DVR and PSI methods, showing that it increases with temperature and ranges from approximately 1.5 to 6.5 at 300-1000 K, with excellent agreement over the entire temperature range.
